# Supplementary material for: Combating transnational organized crime by linking multiple large ivory seizures to the same dealer
Source: PubMed Central journal article supplement — Sci Adv. 2018 Sep 19;4(9):eaat0625. doi: 10.1126/sciadv.aat0625 (PMC6155029; doi:10.1126/sciadv.aat0625), 2018-09-19
Supplement: aat0625_SM.pdf [file aat0625_SM.pdf]

## Supplementary Materials for

### Combating transnational organized crime by linking multiple large ivory seizures to the same dealer

Samuel K. Wasser\*, Amy Torkelson, Misa Winters, Yves Horeaux, Sean Tucker, Moses Y. Otiende, Frankie A.T. Sitam, John Buckleton, Bruce S. Weir

\*Corresponding author. Email: wassers@uw.edu

Published 19 September 2018, *Sci. Adv.* **4**, eaat0625 (2018)  
DOI: 10.1126/sciadv.aat0625

#### This PDF file includes:

- Table S1A. Western forest elephant reference locations.
- Table S1B. Central forest elephant reference locations.
- Table S1C. Southern savannah elephant reference locations.
- Table S1D. Eastern savannah elephant reference locations.
- Table S1E. Northern savannah elephant reference locations.
- Table S2A. Seizures 2002–2012.
- Table S2B. Seizures 2013–2016.
- Table S3A. Matching pairs of savannah elephant samples.
- Table S3B. Matching pairs of forest and hybrid elephant samples.
- Table S4. Dropout model parameters.
- Table S5. Estimated total number of matching samples ( $M_{ij}$ ) for each seizure pair.
- Fig. S1. Population-specific  $F_{ST}$  estimates for forest elephants.
- Fig. S2. Population-specific  $F_{ST}$  estimates for savannah elephants.

## Supplementary Materials

Table S1A. Western forest elephant reference locations.

| Country Code | Reference Location      | Geographic Region | Latitude | Longitude | Number of Samples |
|--------------|-------------------------|-------------------|----------|-----------|-------------------|
| SL           | Outamba-Kilimi          | Western Forest    | 9.72     | -12.13    | 8                 |
| GN           | Ziama Classified Forest | Western Forest    | 8.28     | -9.25     | 7                 |
| CI           | Taï                     | Western Forest    | 5.8      | -7.5      | 1                 |
| BF           | Mouhoun Complex         | Western Forest    | 11.6     | -3.3      | 52                |
| GH           | Bia                     | Western Forest    | 6.33     | -3        | 18                |
| GH           | Mole                    | Western Forest    | 9        | -2        | 12                |
| BF           | Pô-Nazinga-Sissili      | Western Forest    | 11.3     | -1.5      | 6                 |
| TG           | Fazao-Malfakassa        | Western Forest    | 8.7      | 0.8       | 13                |
| BJ/BF        | Pendjari-Arli           | Western Forest    | 11.3     | 1.4       | 102               |
| BJ/BF        | W                       | Western Forest    | 11.9     | 2.4       | 12                |

Table S1B. Central forest elephant reference locations.

| <b>Country Code</b> | <b>Reference Location</b> | <b>Geographic Region</b> | <b>Latitude</b> | <b>Longitude</b> | <b>Number of Samples</b> |
|---------------------|---------------------------|--------------------------|-----------------|------------------|--------------------------|
| CM                  | Banyang-Mbo               | Central Forest           | 5               | 9.5              | 6                        |
| GA                  | Loango-Moukalaba          | Central Forest           | -2              | 9.9              | 14                       |
| GA                  | Lopé                      | Central Forest           | -0.25           | 11.53            | 17                       |
| AO                  | Cabinda Province          | Central Forest           | -4.7            | 12.65            | 3                        |
| GA                  | Minkébé                   | Central Forest           | 1.8             | 12.7             | 24                       |
| CM                  | Dja                       | Central Forest           | 3.2             | 13               | 5                        |
| GA                  | Batéké Plateau            | Central Forest           | -2.2            | 13.8             | 12                       |
| CM                  | Nki                       | Central Forest           | 2.4             | 14.5             | 14                       |
| CG                  | Odzala-Kokoua             | Central Forest           | 1               | 14.9             | 37                       |
| CF                  | Dzanga-Sangha             | Central Forest           | 2.8             | 16.35            | 94                       |
| CF                  | Bamingui                  | Central Forest           | 7.54            | 20.18            | 2                        |
| CD                  | Salonga North             | Central Forest           | -1.21           | 20.96            | 23                       |
| CD                  | Salonga South             | Central Forest           | -2.1            | 21.1             | 6                        |
| CD                  | Bomu East                 | Central Forest           | 4.46            | 24.66            | 12                       |
| CD                  | Lomami                    | Central Forest           | -1.44           | 24.95            | 8                        |
| SS                  | Southern                  | Central Forest           | 6.6             | 28.3             | 1                        |
| CD                  | Okapi                     | Central Forest           | 1.5             | 28.5             | 10                       |
| CD                  | Kahuzi-Biega              | Central Forest           | -2.2            | 28.7             | 1                        |
| CD                  | Garamba                   | Central Forest           | 4               | 29.46            | 27                       |
| RW                  | Volcans                   | Central Forest           | -1.5            | 29.5             | 9                        |
| UG                  | Bwindi Impenetrable       | Central Forest           | -1              | 29.7             | 4                        |
| UG                  | Semuliki                  | Central Forest           | 0.8             | 30               | 3                        |
| UG                  | Queen Elizabeth           | Central Forest           | -0.2            | 30               | 1                        |
| UG                  | Kibale                    | Central Forest           | 0.5             | 30.4             | 9                        |
| SS                  | Bandingilo                | Central Forest           | 4.9             | 32               | 1                        |
| SS                  | Kidepo                    | Central Forest           | 4.4             | 32.6             | 3                        |

Table S1C. Southern savannah elephant reference locations.

| <b>Country Code</b> | <b>Reference Location</b> | <b>Geographic Region</b> | <b>Latitude</b> | <b>Longitude</b> | <b>Number of Samples</b> |
|---------------------|---------------------------|--------------------------|-----------------|------------------|--------------------------|
| ZA                  | Kruger                    | Southern Savannah        | -23.83          | 31.5             | 109                      |
| BW                  | Mashatu-Tuli              | Southern Savannah        | -22.08          | 29.11            | 22                       |
| NA                  | Torra Conservancy         | Southern Savannah        | -20.16          | 13.59            | 2                        |
| ZW                  | Hwange                    | Southern Savannah        | -19.05          | 26.6             | 54                       |
| NA                  | Etosha                    | Southern Savannah        | -18.75          | 15.5             | 14                       |
| MZ                  | Gorongosa                 | Southern Savannah        | -18.55          | 34.26            | 13                       |
| BW                  | Chobe                     | Southern Savannah        | -18.33          | 24.86            | 81                       |
| ZW                  | Sengwa Landscape          | Southern Savannah        | -18.22          | 28.56            | 16                       |
| MW                  | Majete                    | Southern Savannah        | -16             | 34.7             | 8                        |
| ZM                  | Lower Zambezi             | Southern Savannah        | -15.5           | 29.7             | 10                       |
| ZM                  | Kafue                     | Southern Savannah        | -15.2           | 25.9             | 18                       |
| MW                  | Liwonde                   | Southern Savannah        | -14.9           | 35               | 17                       |
| MW                  | Kasungu                   | Southern Savannah        | -12.9           | 33.5             | 12                       |
| ZM                  | Kasanka                   | Southern Savannah        | -12.6           | 30.2             | 3                        |
| ZM                  | Luangwa                   | Southern Savannah        | -12.5           | 32               | 26                       |
| MZ                  | Niassa                    | Southern Savannah        | -11.83          | 37.91            | 26                       |
| ZM                  | Sumbu                     | Southern Savannah        | -8.63           | 30.43            | 7                        |

Table S1D. Eastern savannah elephant reference locations.

| <b>Country Code</b> | <b>Reference Location</b> | <b>Geographic Region</b> | <b>Latitude</b> | <b>Longitude</b> | <b>Number of Samples</b> |
|---------------------|---------------------------|--------------------------|-----------------|------------------|--------------------------|
| TZ                  | Selous Ecosystem          | Eastern Savannah         | -8.8            | 37.5             | 18                       |
| TZ                  | Udzungwa Mountains        | Eastern Savannah         | -7.75           | 36.69            | 5                        |
| TZ                  | Mikumi                    | Eastern Savannah         | -7.6            | 37.14            | 59                       |
| TZ                  | Ruaha                     | Eastern Savannah         | -7.5            | 34.75            | 35                       |
| TZ                  | Rukwa                     | Eastern Savannah         | -7.2            | 31.98            | 12                       |
| TZ                  | Katavi                    | Eastern Savannah         | -6.74           | 31.05            | 18                       |
| TZ                  | Saadani                   | Eastern Savannah         | -5.98           | 38.69            | 1                        |
| TZ                  | Muhesi                    | Eastern Savannah         | -5.67           | 34.58            | 19                       |
| KE                  | Shimba Hills              | Eastern Savannah         | -4.3            | 39.4             | 39                       |
| TZ                  | Tarangire                 | Eastern Savannah         | -4.1            | 36.1             | 39                       |
| TZ                  | Ngorongoro                | Eastern Savannah         | -3.23           | 35.57            | 15                       |
| KE                  | Tsavo                     | Eastern Savannah         | -3.01           | 38.51            | 73                       |
| KE                  | Amboseli                  | Eastern Savannah         | -2.55           | 37.26            | 70                       |
| RW                  | Nyungwe Forest            | Eastern Savannah         | -2.5            | 29.3             | 2                        |
| TZ                  | Serengeti                 | Eastern Savannah         | -1.97           | 35.03            | 16                       |
| RW                  | Akagera                   | Eastern Savannah         | -1.6            | 30.7             | 8                        |
| KE                  | Masai Mara                | Eastern Savannah         | -1.4            | 35.3             | 10                       |
| CD                  | Virunga                   | Eastern Savannah         | -1.25           | 29.5             | 9                        |
| KE                  | Aberdare                  | Eastern Savannah         | -0.42           | 36.63            | 25                       |
| UG                  | Queen Elizabeth           | Eastern Savannah         | -0.2            | 30.11            | 63                       |
| KE                  | Mount Kenya               | Eastern Savannah         | -0.15           | 37.3             | 31                       |
| KE/UG               | Mount Elgon               | Eastern Savannah         | 0.5             | 34.62            | 1                        |
| KE                  | Marsabit                  | Eastern Savannah         | 2.3             | 37.9             | 4                        |
| UG                  | Murchison Falls           | Eastern Savannah         | 2.33            | 31.54            | 36                       |
| SS                  | Nimule                    | Eastern Savannah         | 3.6             | 32               | 31                       |
| UG                  | Kidepo Valley             | Eastern Savannah         | 3.84            | 33.69            | 17                       |
| SS                  | Bandingilo                | Eastern Savannah         | 4.91            | 32               | 2                        |
| ET                  | Mago                      | Eastern Savannah         | 5.5             | 36.3             | 4                        |
| SS                  | Boma                      | Eastern Savannah         | 6.6             | 33.8             | 11                       |
| SS                  | Ez Zeraf                  | Eastern Savannah         | 7.8             | 30.7             | 30                       |
| ER                  | Gash-Setit                | Eastern Savannah         | 14.8            | 37.3             | 3                        |
| UG                  | Kibale                    | Eastern Savannah         | 0.5             | 30.5             | 23                       |

Table S1E. Northern savannah elephant reference locations.

| <b>Country Code</b> | <b>Reference Location</b> | <b>Geographic Region</b> | <b>Latitude</b> | <b>Longitude</b> | <b>Number of Samples</b> |
|---------------------|---------------------------|--------------------------|-----------------|------------------|--------------------------|
| TD                  | Larmanaye Ecosystem       | Northern Savannah        | 8               | 16               | 8                        |
| CM                  | Benoué                    | Northern Savannah        | 8.1             | 14               | 16                       |
| NG                  | Yankari                   | Northern Savannah        | 9.83            | 10.58            | 3                        |
| TD                  | Massenya Ecosystem        | Northern Savannah        | 10.45           | 16.48            | 8                        |
| TD                  | Zakouma                   | Northern Savannah        | 11.1            | 19.5             | 29                       |
| CM                  | Waza                      | Northern Savannah        | 11.3            | 14.8             | 20                       |
| ML                  | Gourma Partial            | Northern Savannah        | 15.5            | -2.4             | 34                       |

Country code: ISO Alpha-2

Reference Location: Name of reference population locations

Latitude and Longitude: Decimal degrees

Table S2A. Seizures 2002-2012.

| <b>Location of Seizure</b> | <b>Month/Year of Seizure</b> | <b>Weight (tonne)</b> | <b>Known Point(s) of Export</b> | <b>S<sub>Z</sub></b> | <b>E<sub>x</sub></b> | <b>A<sub>M</sub></b> | <b>S</b> | <b>F</b> | <b>H</b> |
|----------------------------|------------------------------|-----------------------|---------------------------------|----------------------|----------------------|----------------------|----------|----------|----------|
| Singapore                  | Jun 2002                     | 6.5                   | Malawi                          | 532                  | 66                   | 38                   | 35       | 0        | 0        |
| Hong Kong                  | May 2006                     | 4.0                   | Douala                          | 603                  | 99                   | 32                   | 0        | 29       | 0        |
| Taiwan                     | Jul 2006                     | 3.0                   | DSM                             | 744                  | 60                   | 48                   | 30       | 0        | 0        |
| Taiwan                     | Jul 2006                     | 1.2                   | DSM                             | 350                  | 89                   | 55                   | 40       | 0        | 0        |
| Hong Kong                  | Jul 2006                     | 2.6                   | DSM                             | 390                  | 150                  | 114                  | 96       | 0        | 0        |
| Singapore                  | Mar 2007                     | 0.5                   | Zambia                          | 70                   | 45                   | 37                   | 29       | 0        | 0        |
| Phillippines               | Mar 2009                     | 4.8                   | DSM                             | 1701                 | 281                  | 106                  | 99       | 0        | 0        |
| Vietnam                    | Apr 2010                     | 2.2                   | Mombasa                         | 400                  | 100                  | 99                   | 86       | 0        | 0        |
| Kenya                      | Aug 2010                     | 1.5                   | Nairobi                         | 317                  | 219                  | 126                  | 116      | 0        | 0        |
| Thailand                   | Jan 2011                     | 0.3                   | MOZ                             | 69                   | 73                   | 45                   | 32       | 0        | 0        |
| Kenya                      | May 2011                     | 1.3                   | Nairobi                         | 115                  | 77                   | 41                   | 39       | 0        | 0        |
| Kenya                      | Sep 2011                     | 0.3                   | Mombasa                         | 32                   | 19                   | 14                   | 14       | 0        | 0        |
| Malaysia                   | Sep 2011                     | 1.1                   | UNK                             | 545                  | 82                   | 68                   | 66       | 0        | 0        |
| Kenya                      | Dec 2011                     | 1.5                   | Mombasa                         | 470                  | 184                  | 164                  | 141      | 0        | 0        |
| Sri Lanka                  | May 2012                     | 1.5                   | Entebbe, Mombasa                | 359                  | 205                  | 130                  | 126      | 0        | 0        |
| Hong Kong                  | Oct 2012                     | 1.9                   | DSM                             | 972                  | 122                  | 83                   | 67       | 0        | 0        |
| Hong Kong                  | Oct 2012                     | 1.9                   | Mombasa                         | 237                  | 100                  | 88                   | 74       | 0        | 0        |
| Hong Kong                  | Jan 2013                     | 1.3                   | Mombasa                         | 779                  | 106                  | 51                   | 43       | 0        | 0        |
| Malaysia                   | Dec 2012                     | 6.0                   | Lome, Mombasa                   | 2300                 | 266                  | 207                  | 117      | 75       | 0        |

Table S2B. Seizures 2013-2016.

| Location of Seizure | Month/Year of Seizure | Weight (tonne) | Known Point(s) of Export | S <sub>Z</sub> | E <sub>x</sub> | A <sub>M</sub> | S   | F  | H  |
|---------------------|-----------------------|----------------|--------------------------|----------------|----------------|----------------|-----|----|----|
| Kenya               | Jan 2013              | 3.8            | Mombasa                  | 638            | 184            | 164            | 144 | 1  | 1  |
| Malawi              | May 2013              | 2.6            | Malawi                   | 781            | 200            | 62             | 60  | 0  | 0  |
| Dubai               | May 2013              | 1.5            | Entebbe, Mombasa         | 259            | 151            | 119            | 100 | 0  | 0  |
| Kenya               | Jun 2013              | 3.3            | Mombasa                  | 444            | 187            | 148            | 130 | 0  | 0  |
| Kenya               | Jun 2013              | 1.5            | Entebbe, Mombasa         | 775            | 348            | 279            | 218 | 12 | 11 |
| Hong Kong           | Jul 2013              | 2.0            | Lome                     | 1148           | 200            | 49             | 0   | 48 | 0  |
| Togo                | Aug 2013              | 0.7            | Lome                     | 69             | 69             | 36             | 2   | 23 | 1  |
| Hong Kong           | Aug 2013              | 2.2            | Lagos                    | 1120           | 200            | 119            | 4   | 84 | 0  |
| Uganda              | Oct 2013              | 2.9            | Entebbe                  | 823            | 187            | 116            | 94  | 4  | 3  |
| Kenya               | Oct 2013              | 2.9            | Entebbe, Mombasa         | 956            | 185            | 155            | 129 | 4  | 2  |
| Kenya               | Oct 2013              | 2.0            | Mombasa                  | 686            | 185            | 163            | 134 | 0  | 0  |
| Uganda              | Dec 2013              | 1.4            | Entebbe                  | 440            | 188            | 106            | 93  | 5  | 0  |
| Togo                | Jan 2014              | 3.9            | Lome                     | 1500           | 200            | 79             | 6   | 70 | 0  |
| Singapore           | Mar 2014              | 1.0            | Entebbe, Mombasa         | -              | 53             | 36             | 34  | 0  | 1  |
| Uganda              | May 2014              | 1.8            | Entebbe                  | 381            | 148            | 120            | 86  | 1  | 3  |
| Kenya               | Jun 2014              | 2.2            | Mombasa                  | 314            | 195            | 154            | 112 | 0  | 0  |
| Uganda              | Jul 2014              | 0.6            | Entebbe                  | 271            | 98             | 81             | 52  | 0  | 0  |
| Singapore           | May 2015              | 4.6            | Mombasa                  | 1161           | 250            | 195            | 181 | 2  | 0  |
| Mozambique          | May 2016              | 1.5            | Matola                   | 356            | 50             | 50             | 48  | 0  | 0  |
| South Sudan         | Jun 2016              | 0.5            | Entebbe                  | 82             | 82             | 64             | 56  | 1  | 1  |

DSM: Dar es Salaam

MOZ: Mozambique

UNK: unknown

S<sub>Z</sub>: Number of tusks in seizureE<sub>x</sub>: Number of tusks extractedA<sub>M</sub>: Number of tusks amplified at  $\geq 10$  loci

S: Number of unique savannah elephant genotypes

F: Number of unique forest elephant genotypes

H: Number of unique hybrid elephant genotypes



Table S3A. Matching pairs of savannah elephant samples.

| Sample 1       | Sample 2     | M  | D | U | Seizure 1              | Seizure 2               |
|----------------|--------------|----|---|---|------------------------|-------------------------|
| AVP.EBB<br>154 | KKP015       | 16 | 0 | 0 | Uganda Oct 2013 2.9t   | Kenya Jun 2013 1.5t     |
| AVP.EBB<br>239 | KKP009       | 16 | 0 | 0 | Uganda Oct 2013 2.9t   | Kenya Jun 2013 1.5t     |
| AVP.EBB<br>391 | KKP347       | 16 | 0 | 0 | Uganda Oct 2013 2.9t   | Kenya Jun 2013 1.5t     |
| DUB030         | KSP046       | 15 | 1 | 0 | Dubai May 2013 1.5t    | Kenya Jan 2013 3.8t     |
| DUB060         | KCM045       | 10 | 0 | 6 | Dubai May 2013 1.5t    | Kenya Oct 2013 2.9t     |
| DUB065         | KSP139       | 16 | 0 | 0 | Dubai May 2013 1.5t    | Kenya Jan 2013 3.8t     |
| DUB141         | KCM026       | 16 | 0 | 0 | Dubai May 2013 1.5t    | Kenya Oct 2013 2.9t     |
| DUB142         | KCM019       | 15 | 1 | 0 | Dubai May 2013 1.5t    | Kenya Oct 2013 2.9t     |
| KAD06          | KSP001       | 14 | 1 | 1 | Kenya Sep 2011 0.3t    | Kenya Jan 2013 3.8t     |
| KCM054         | KX093        | 10 | 2 | 4 | Kenya Oct 2013 2.9t    | Kenya Oct 2013 2.0t     |
| KCM111         | KX038        | 12 | 3 | 1 | Kenya Oct 2013 2.9t    | Kenya Oct 2013 2.0t     |
| KCM118         | KX100        | 14 | 1 | 1 | Kenya Oct 2013 2.9t    | Kenya Oct 2013 2.0t     |
| KCM140         | MYS1916      | 14 | 0 | 2 | Kenya Oct 2013 2.9t    | Malaysia Dec 2012 6.0t  |
| KCM160         | UG.B137      | 14 | 2 | 0 | Kenya Oct 2013 2.9t    | Uganda May 2014 1.8t    |
| KCM168         | UG.B131      | 15 | 1 | 0 | Kenya Oct 2013 2.9t    | Uganda May 2014 1.8t    |
| KCM170         | KX130        | 16 | 0 | 0 | Kenya Oct 2013 2.9t    | Kenya Oct 2013 2.0t     |
| KKP147         | UWA.A<br>040 | 16 | 0 | 0 | Kenya Jun 2013 1.5t    | Uganda Dec 2013 1.4t    |
| KKP323         | UWA.B<br>100 | 16 | 0 | 0 | Kenya Jun 2013 1.5t    | Uganda Dec 2013 1.4t    |
| KMN004         | SL324        | 15 | 1 | 0 | Kenya Dec 2011 1.5t    | Sri Lanka May 2012 1.5t |
| MYS0012        | TOGI030      | 16 | 0 | 0 | Malaysia Dec 2012 6.0t | Togo Jan 2014 3.9t      |
| MYS0062        | TOGI176      | 11 | 0 | 5 | Malaysia Dec 2012 6.0t | Togo Jan 2014 3.9t      |
| MYS1119        | SL129        | 16 | 0 | 0 | Malaysia Dec 2012 6.0t | Sri Lanka May 2012 1.5t |

Table S3B. Matching pairs of forest and hybrid elephant samples.

| Sample 1 | Sample 2   | Spp. | M  | D | U | Seizure 1                                                       | Seizure 2              |
|----------|------------|------|----|---|---|-----------------------------------------------------------------|------------------------|
| G04      | KKP021-123 | F    | 14 | 1 | 0 | Garamba Poaching Event<br>DRC May 2012<br>(22 elephants killed) | Kenya<br>Jun 2013 1.5t |
| G05      | KKP020     | F    | 14 | 1 | 0 | Garamba Poaching Event<br>DRC May 2012<br>(22 elephants killed) | Kenya<br>Jun 2013 1.5t |
| G09      | KKP140     | H    | 15 | 0 | 0 | Garamba Poaching Event<br>DRC May 2012<br>(22 elephants killed) | Kenya<br>Jun 2013 1.5t |
| G15      | KKP118     | F    | 15 | 0 | 0 | Garamba Poaching Event<br>DRC May 2012<br>(22 elephants killed) | Kenya<br>Jun 2013 1.5t |
| MYS0648  | TG59       | F    | 14 | 0 | 1 | Malaysia Dec 2012 6.0t                                          | Togo<br>Aug 2013 0.7t  |

M: Matching loci  
D: Discrepant loci  
U: Unconfirmed loci  
Spp.: Species  
S: Savannah elephant  
F: Forest elephant  
H: Hybrid elephant  
t: tonne (metric ton)

Table S4. Dropout model parameters.

| <b>Locus</b> | <b>Forest</b><br>$\beta_{0,l}$ | <b>Forest</b><br>$\beta_{1,l}$ | <b>Savannah</b><br>$\beta_{0,l}$ | <b>Savannah</b><br>$\beta_{1,l}$ |
|--------------|--------------------------------|--------------------------------|----------------------------------|----------------------------------|
| FH67         | 20.90762                       | -2.337118                      | 22.52742                         | -2.48681                         |
| FH71         | 16.6655                        | -1.892238                      | 18.56313                         | -2.04957                         |
| FH19         | 20.96454                       | -2.248918                      | 19.49798                         | -2.110348                        |
| FH129        | 26.03334                       | -2.845293                      | 18.95384                         | -2.090801                        |
| FH60         | 20.43614                       | -2.309053                      | 21.41919                         | -2.362466                        |
| FH127        | 26.94547                       | -2.914146                      | 23.83428                         | -2.546739                        |
| FH126        | 20.17681                       | -2.298858                      | 21.76632                         | -2.439058                        |
| FH153        | N/A                            | N/A                            | 23.0354                          | -2.517223                        |
| FH94         | 24.38787                       | -2.581312                      | 20.41949                         | -2.225514                        |
| FH48         | 21.75029                       | -2.346354                      | 23.47679                         | -2.537773                        |
| FH40         | 24.18229                       | -2.58625                       | 24.77487                         | -2.610052                        |
| FH39         | 25.33755                       | -2.712232                      | 24.83543                         | -2.666695                        |
| FH103        | 20.31656                       | -2.268773                      | 24.07823                         | -2.605241                        |
| FH102        | 22.23563                       | -2.448915                      | 22.70349                         | -2.453062                        |
| S03          | 20.37575                       | -2.252319                      | 21.56734                         | -2.3314                          |
| S04          | 18.88276                       | -2.134013                      | 24.23833                         | -2.631552                        |

Beta coefficients  $\beta_{0,l}$  and  $\beta_{1,l}$  determined by maximum likelihood and used in the fitted model of drop-out probabilities (see methods). These are calculated separately for forest and savanna elephants.

Table S5. Estimated total number of matching samples ( $M_{ij}$ ) for each seizure pair.

| Seizure $i$                | Seizure $j$               | $m_{ij}$ | $n_i$ | $n_j$ | $N_i$ | $N_j$ | $M_j$ | $M_{ij}/\min(N_i N_j)$ |
|----------------------------|---------------------------|----------|-------|-------|-------|-------|-------|------------------------|
| Kenya<br>Sep 2011 0.3t     | Kenya<br>Jan 2013 3.8t    | 1        | 14    | 144   | 32    | 638   | 2     | 0.0625                 |
| Sri Lanka<br>May 2012 1.5t | Kenya<br>Dec 2011 1.5t    | 1        | 126   | 141   | 359   | 470   | 2     | 0.0056                 |
| Kenya<br>Oct 2013 2.9t     | Malaysia<br>Dec 2012 6.0t | 1        | 129   | 117   | 956   | 2300  | 8     | 0.0084                 |
| Dubai<br>May 2013 1.5t     | Kenya<br>Jan 2013 3.8t    | 2        | 100   | 144   | 259   | 638   | 5     | 0.0193                 |
| Kenya<br>Jun 2013 1.5 t    | Uganda<br>Oct 2013 2.9t   | 3        | 218   | 94    | 775   | 823   | 24    | 0.0310                 |
| Togo<br>Aug 2013 0.7t      | Malaysia<br>Dec 2012 6.0t | 1        | 23    | 75    | 69    | 2300  | 3     | 0.0435                 |
| Dubai<br>May 2013 1.5t     | Kenya<br>Oct 2013 2.9t    | 2        | 100   | 129   | 259   | 956   | 5     | 0.0193                 |
| Kenya<br>Oct 2013 2.0t     | Kenya<br>Oct 2013 2.9t    | 4        | 134   | 129   | 686   | 956   | 21    | 0.0306                 |
| Uganda<br>Dec 2013 1.4t    | Kenya<br>Jun 2013 1.5t    | 2        | 93    | 218   | 440   | 775   | 9     | 0.0205                 |
| Togo<br>2014 3.9t          | Malaysia<br>Dec 2012 6.0t | 2        | 6     | 117   | 1500  | 2300  | 500   | 0.3333                 |
| Uganda<br>May 2014 1.8t    | Kenya<br>Oct 2013 2.9t    |          | 86    | 129   | 381   | 956   | 8     | 0.0210                 |
| Sri Lanka<br>May 2012 1.5t | Malaysia<br>Dec 2012 6.0t | 1        | 126   | 117   | 359   | 2300  | 3     | 0.0084                 |

t: tonne (metric ton)

$m_{ij}$ : observed number of matching samples between seizures  $i$  and  $j$

$n_i$ : number of unique genotypes in seizure  $i$

$n_j$ : number of unique genotypes in seizure  $j$

$N_i$ : total number of samples in seizure  $i$

$N_j$ : total number of samples in seizure  $j$

$M_{ij}$ : Estimated total number of matching samples between seizures  $i$  and  $j$

$M_{ij}/\min(N_i N_j)$ : Fraction of matching samples in the smaller of seizures  $i$  and  $j$

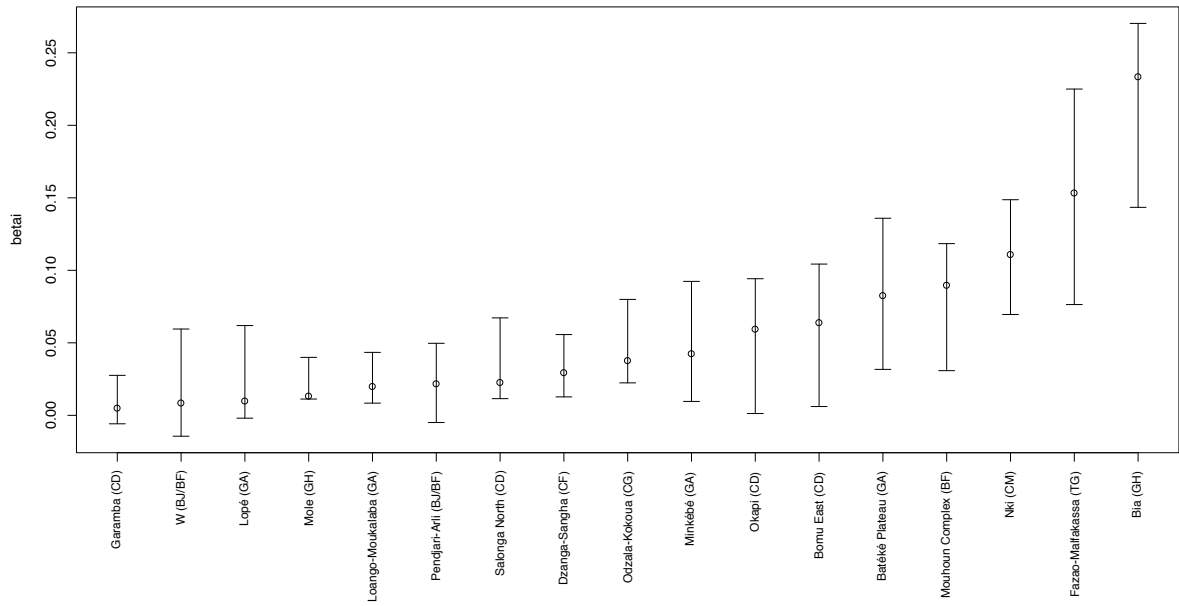

Fig. S1. Population-specific  $F_{ST}$  estimates for forest elephants.

Point estimates: circles

Whiskers: 95% confidence intervals from bootstrapping over loci

Mean point estimate:  $\theta = 0.059$

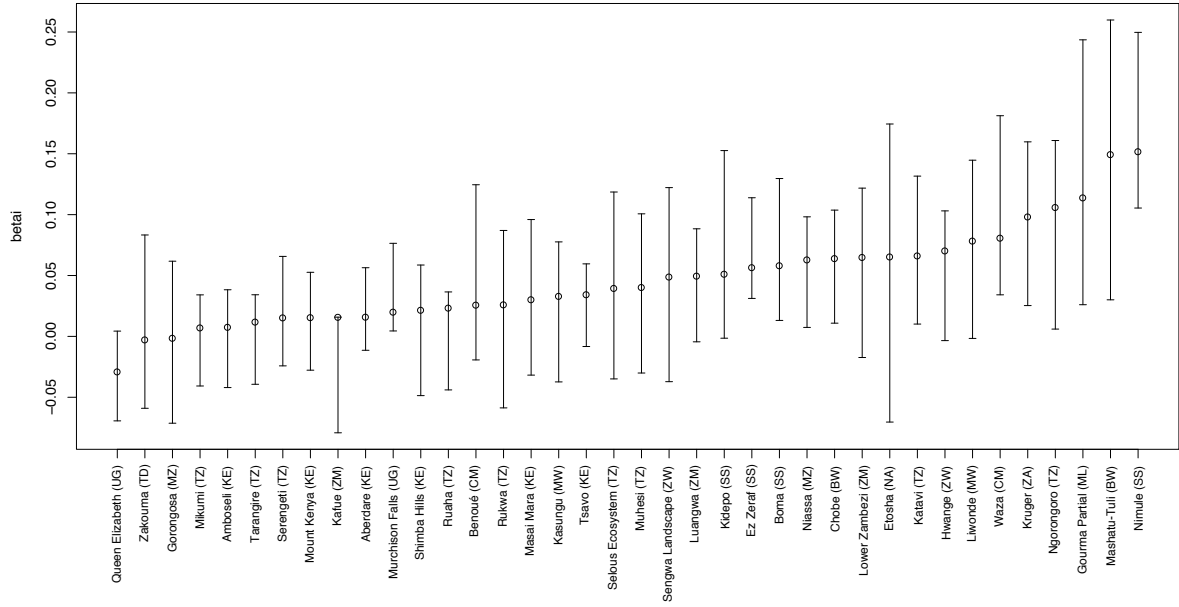

Fig. S2. Population-specific  $F_{ST}$  estimates for savannah elephants.

Point estimates: circles

Whiskers: 95% confidence intervals from bootstrapping over loci

Mean point estimate:  $\theta = 0.047$
